# Supplementary material for: Transport of thyroid hormones is selectively inhibited by 3-iodothyronamine
Source: Royal Society of Chemistry journal article supplement (doi:10.1039/b926588k), 2010-03-31
Supplement: b926588k.pdf [file b926588k.pdf]

**Electronic Supplementary Information for:**

**Transport of thyroid hormones is selectively inhibited by 3-iodothyronamine**

Alexandra G. Ianculescu<sup>1</sup>, Edith C.H. Friesema<sup>2</sup>, Theo J. Visser<sup>2</sup>, Kathleen M. Giacomini<sup>3</sup>, and Thomas S. Scanlan<sup>4</sup>

<sup>1</sup>Department of Biochemistry and Biophysics, University of California at San Francisco, San Francisco, California, <sup>2</sup>Department of Internal Medicine, Erasmus University Medical Center Rotterdam, The Netherlands, <sup>3</sup>Department of Biopharmaceutical Sciences, University of California at San Francisco, San Francisco, California and <sup>4</sup>Department of Physiology and Pharmacology, Oregon Health and Science University, Portland, Oregon.

Corresponding author:  
Thomas S. Scanlan, PhD  
Department of Physiology and Pharmacology  
Oregon Health and Science University  
Biomedical Sciences Building, Room 615  
3181 SW Sam Jackson Park Road, L334  
Portland, Oregon 97239-3098  
Phone: (503) 494-9292; Fax: (503) 494-9275  
Email: scanlant@ohsu.edu

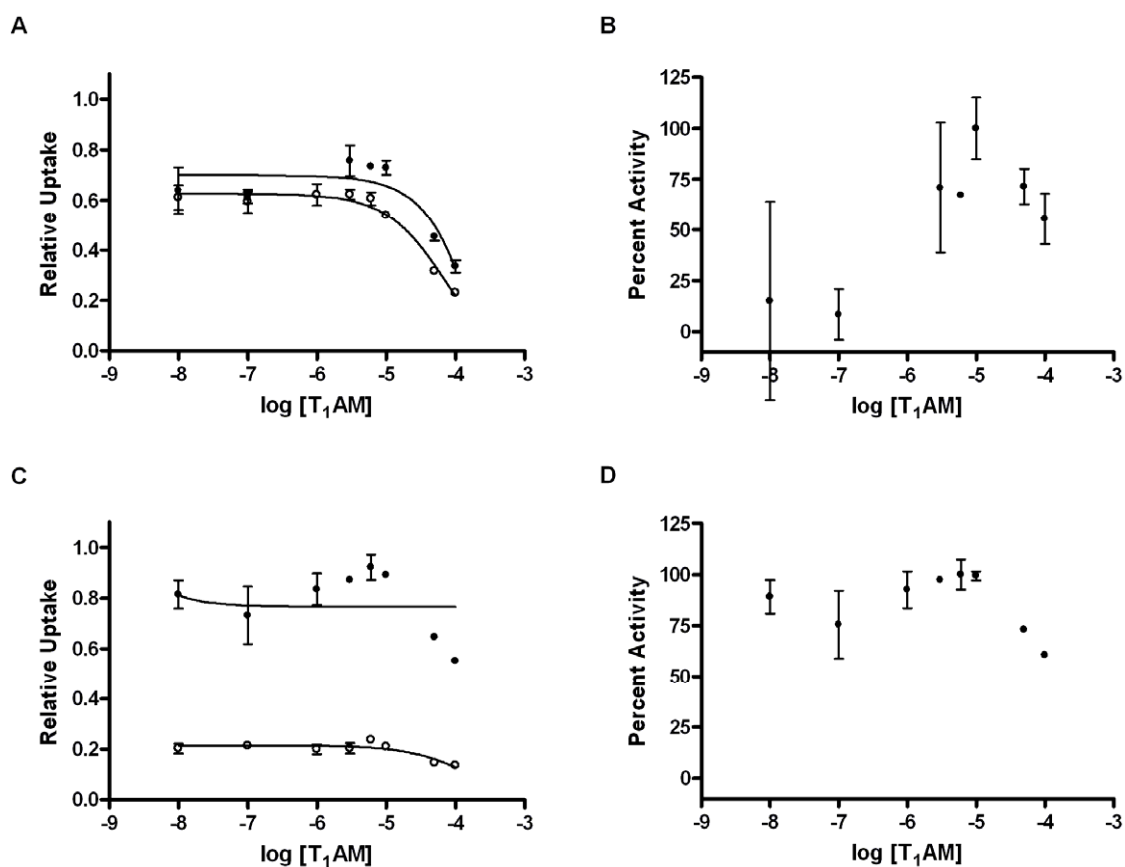

**Figure S1.** Thyroid hormone transport by OATP1B3. A, B) T<sub>3</sub> uptake by COS-1 cells transfected with OATP1B3 (solid circles) or empty vector (empty circles) and CRYM, an intracellular thyroid hormone-binding protein. Cells were incubated for 60 min at 37°C with <sup>125</sup>I-labeled T<sub>3</sub> in the presence of various concentrations of T<sub>1</sub>AM. Total uptake (A) and net uptake levels corrected for background uptake observed in cells transfected with empty vector (B) are shown. C, D) T<sub>4</sub> uptake by COS-1 cells transfected with OATP1B3 (solid circles) or empty vector (empty circles) and CRYM, an intracellular thyroid hormone-binding protein. Cells were incubated for 60 min at 37°C with <sup>125</sup>I-labeled T<sub>4</sub> in the presence of various concentrations of T<sub>1</sub>AM. Total uptake (C) and net uptake levels corrected for background uptake observed in cells transfected with empty vector (D) are shown.
